# Supplementary material for: Comparative Pharmacokinetics Research of 13 Bioactive Components of Jieyu Pills in Control and Attention Deficit Hyperactivity Disorder Model Rats Based on UPLC-Orbitrap Fusion MS
Source: MDPI journal article supplement (doi:10.3390/molecules29061230), 2024-03-10
Supplement: s1 [file s1]

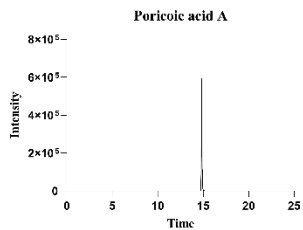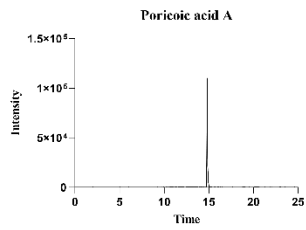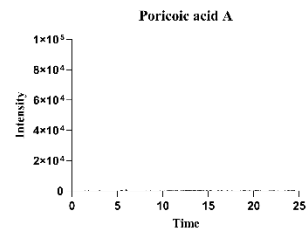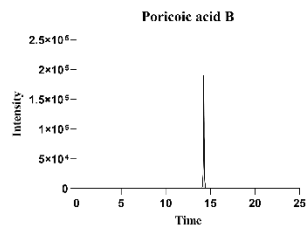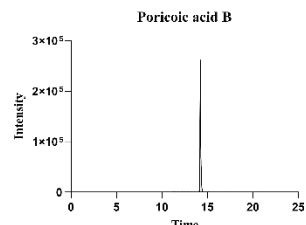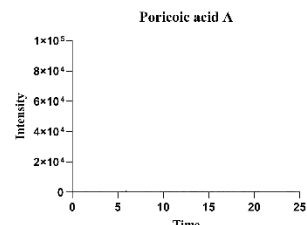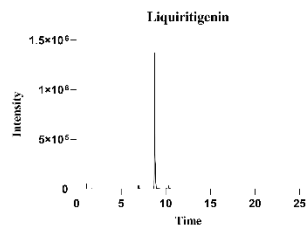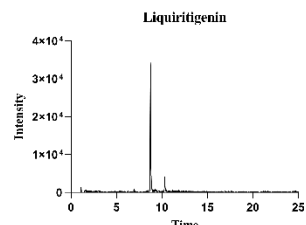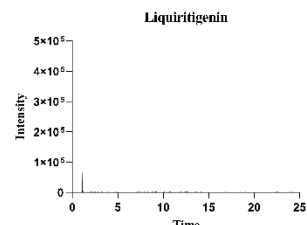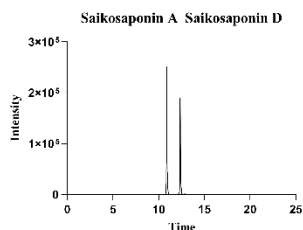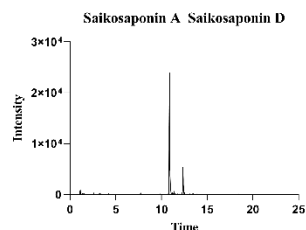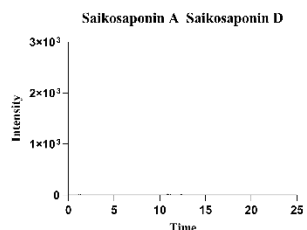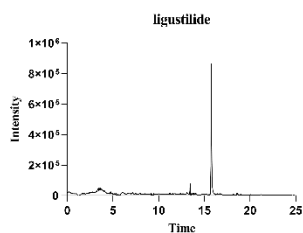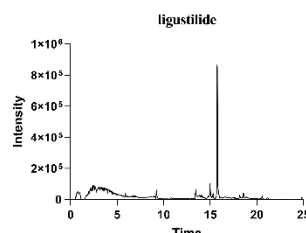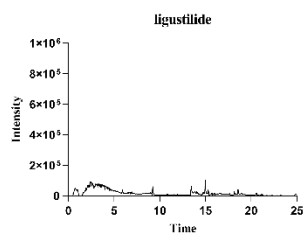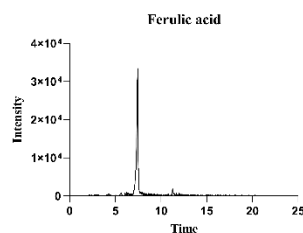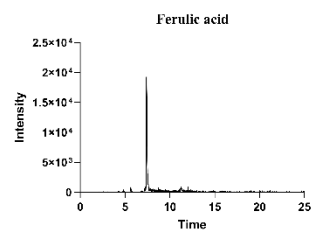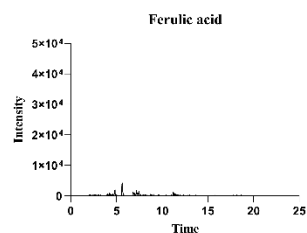

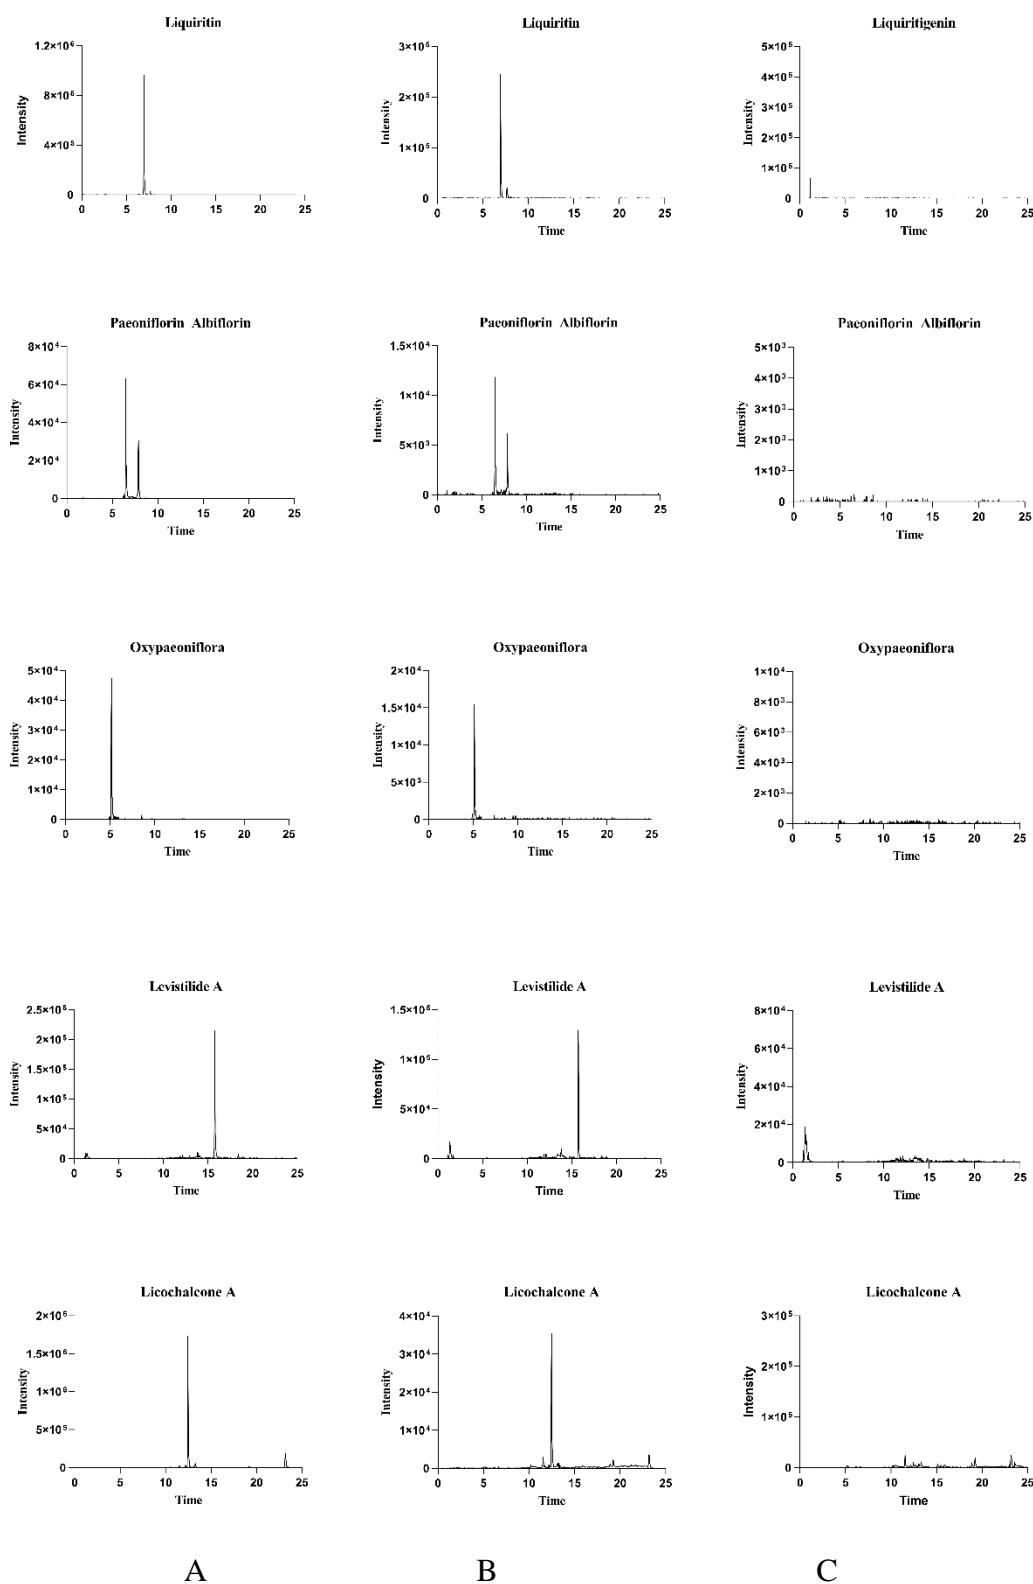

**Figure S1.** Exclusive chromatogram of components to be tested (A: chromatogram of QC sample, B: chromatogram of sample, C: chromatogram of blank plasma)

**Table S1.** Main pharmacokinetic parameters of the control groups after administration of JYP.

| Compound<br>s     | C <sub>max</sub><br>(ng/mL) | AUC <sub>(0-t)</sub><br>(ng/mL·h) | AUC <sub>(0-∞)</sub><br>(ng/mL·h) | T <sub>max</sub><br>(h) | t <sub>1/2</sub><br>(h) | Clearances<br>(mL / h) | MRT <sub>(0-t)</sub><br>(h) | MRT <sub>(0-∞)</sub><br>(h) | V <sub>ss</sub><br>(mL) | AUMC <sub>(0-t)</sub><br>ng/mL*(h) <sup>2</sup> | AUMC <sub>(0-∞)</sub><br>ng/mL*(h) <sup>2</sup> |
|-------------------|-----------------------------|-----------------------------------|-----------------------------------|-------------------------|-------------------------|------------------------|-----------------------------|-----------------------------|-------------------------|-------------------------------------------------|-------------------------------------------------|
| Saikosap<br>nin A | 38.91±10.43                 | 119.62±40.57                      | 134.56±49.83                      | 0.53±0.22               | 7.52±2.66               | 2262.98±1068.5         |                             |                             | 21125.87±12315.99       |                                                 |                                                 |
|                   |                             |                                   |                                   |                         |                         | 6                      | 6.55±1.64                   | 9.57±3.88                   | 42581.43±30523.07       | 792.28±390.55                                   | 1355.37±1006.84                                 |
|                   | 47.41±11.72                 | 148.78±49.46                      | 177.04±46.52                      | 0.39±0.17               | 10.82±9.21              | 3201.17±894.28         | 6.42±0.60                   | 13.26±9.41                  | 39888.83±14247.9z       | 935.87±261.97                                   | 2307.92±1659.75                                 |
|                   | 67.38±14.24                 | 220.57±42.46                      | 244.87±44.68                      | 0.54±0.10               | 7.80±3.30               | 4464.90±760.17         | 6.07±1.19                   | 9.11±3.69                   |                         | 1333.05±317.31                                  | 2265.45±1085.76                                 |
| Saikosap<br>nin D |                             |                                   |                                   |                         |                         | 2081.51±796.95         |                             |                             |                         |                                                 |                                                 |
|                   | 21.53±5.52                  | 79.57±44.57                       | 97.26±56.51                       | 0.43±0.23               | 11.43±4.14              | 3109.21±1089.0         | 7.08±1.57                   | 13.36±4.81                  | 27762.67±16738.07       | 592.40±473.29                                   | 1331.60±1006.07                                 |
|                   | 30.14±6.87                  | 96.80±29.29                       | 116.99±33.20                      | 0.54±0.10               | 10.86±6.69              | 9                      | 6.87±0.65                   | 13.34±6.43                  | 41378.73±24017.48       | 662.12±211.50                                   | 1586.66±988.85                                  |
|                   | 41.77±17.69                 | 115.72±12.30                      | 156.97±34.87                      | 0.33±0.13               | 13.70±5.61              | 4477.49±1178.0         | 7.10±1.12                   | 16.61±6.52                  | 68432.42±15413.77       | 830.12±197.07                                   | 2785.93±1472.47                                 |
| Z-<br>Ligustilide |                             |                                   |                                   |                         |                         | 4                      |                             |                             |                         |                                                 |                                                 |
|                   |                             |                                   |                                   |                         |                         | 9559.18±2479.1         |                             |                             | 190594.33±82167.7       |                                                 |                                                 |
|                   | 3.37±1.11                   | 28.73±8.22                        | 40.81±9.33                        | 1.67±0.52               | 15.40±5.99              | 0                      | 8.54±1.12                   | 20.38±8.24                  | 0                       | 244.45±72.75                                    | 839.61±369.47                                   |
|                   | 4.47±1.90                   | 32.70±6.04                        | 58.61±20.74                       | 1.17±0.41               | 23.99±16.9              | 10223.65±3357.         | 8.96±0.63                   | 32.03±20.8                  | 280622.83±89334.7       | 291.74±50.18                                    | 2206.47±2197.92                                 |
| Levistilide<br>A  | 5.27±1.27                   | 36.53±7.42                        | 53.40±9.38                        | 1.13±0.44               | 4                       | 69                     | 8.76±0.37                   | 8                           | 1                       | 319.41±64.35                                    | 1163.41±438.24                                  |
|                   |                             |                                   |                                   |                         | 16.44±5.40              | 20983.77±4562.         |                             | 21.57±6.20                  | 448255.00±139953.       |                                                 |                                                 |
|                   |                             |                                   |                                   |                         |                         | 19                     |                             |                             | 43                      |                                                 |                                                 |
|                   | 1.79±0.66                   | 12.91±4.96                        | 25.25±7.16                        | 1.17±0.41               | 14.36±4.36              | 794.02±199.77          | 9.51±1.01                   | 22.87±7.04                  | 17878.07±6212.70        | 150.01±45.26                                    | 584.44±254.39                                   |
|                   | 2.86±0.52                   | 21.47±2.97                        | 34.23±5.08                        | 0.92±0.13               | 16.45±7.30              | 1123.37±161.30         | 9.23±0.46                   | 24.13±8.96                  | 26341.48±7666.95        | 197.79±26.58                                    | 849.62±407.65                                   |
|                   | 4.60±2.01                   | 36.70±11.31                       | 59.83±23.13                       | 1.67±0.52               | 22.15±26.8              | 1455.57±663.81         | 8.92±1.16                   | 31.23±38.0                  | 33463.62±24837.03       | 323.93±97.01                                    | 2493.49±4004.18                                 |
|                   |                             |                                   |                                   |                         | 8                       |                        |                             | 6                           |                         |                                                 |                                                 |

|                |             |              |              |           |            |                |           |            |                   |               |                 |
|----------------|-------------|--------------|--------------|-----------|------------|----------------|-----------|------------|-------------------|---------------|-----------------|
| Ferulic acid   | 26.13±9.31  | 112.20±29.20 | 167.65±82.40 | 0.11±0.07 | 15.83±15.5 | 60.71±24.99    | 8.20±0.89 | 21.77±21.4 | 1020.61±427.20    | 920.92±270.38 | 4989.84±7833.58 |
|                | 33.03±6.66  | 164.81±27.71 | 207.47±62.03 | 0.15±0.03 | 1          |                |           | 2          |                   |               |                 |
|                | 41.33±6.94  | 153.34±31.07 | 218.79±56.06 | 0.33±0.13 | 9.53±4.55  |                |           | 13.84±5.77 |                   |               |                 |
|                |             |              |              |           | 15.42±5.57 |                |           | 19.29±4.66 |                   |               |                 |
| Liquiritigenin | 2.95±1.02   | 24.28±7.57   | 37.90±10.24  | 0.58±0.13 | 16.81±4.56 | 139.00±44.74   | 9.56±0.40 | 24.13±6.47 | 3476.06±2016.81   | 231.13±70.38  | 892.16±251.11   |
|                | 4.39±0.47   | 30.41±5.25   | 50.33±15.38  | 0.63±0.21 | 19.40±15.3 |                |           | 27.60±20.6 |                   |               |                 |
|                | 5.27±2.18   | 33.94±6.26   | 48.45±10.22  | 0.58±0.13 | 0          |                |           | 9          |                   |               |                 |
|                |             |              |              |           | 13.44±3.91 |                |           | 19.47±5.47 |                   |               |                 |
| Liquiritin     | 4.21±1.22   | 28.27±5.08   | 37.25±7.36   | 0.49±0.19 | 10.95±2.30 | 1366.04±306.58 | 8.60±0.60 | 16.05±3.72 | 21368.90±3823.75  | 242.78±42.16  | 609.90±217.99   |
|                | 6.35±1.64   | 30.83±8.16   | 44.11±11.65  | 0.38±0.14 | 11.12±2.84 |                |           | 16.55±5.41 |                   |               |                 |
|                | 7.83±3.33   | 40.61±13.09  | 56.01±12.24  | 0.42±0.13 | 13.90±3.40 |                |           | 19.32±5.01 |                   |               |                 |
|                |             |              |              |           |            |                |           |            |                   |               |                 |
| Paeoniflorin   |             |              |              |           |            | 7146.41±1816.5 |           |            | 84257.15±26998.98 |               |                 |
|                | 20.87±5.05  | 77.44±19.10  | 92.68±25.59  | 0.71±0.10 | 10.38±5.59 | 1              | 6.69±1.11 | 12.13±3.83 | 118512.68±32910.6 | 515.74±155.66 | 1159.98±582.94  |
|                | 28.02±12.40 | 104.91±34.22 | 121.52±40.73 | 0.67±0.13 | 9.96±2.44  | 10962.90±2498. |           | 10.82±1.69 |                   |               |                 |
|                | 50.87±10.98 | 179.49±32.14 | 202.71±47.28 | 0.79±0.10 | 7.93±2.12  | 31             |           | 9.59±3.21  |                   |               |                 |
|                |             |              |              |           |            | 12850.86±2810. |           |            |                   |               |                 |
| Albiflorin     |             |              |              |           |            |                |           |            | 6                 |               |                 |
|                |             |              |              |           |            | 92             |           |            |                   |               |                 |
|                |             |              |              |           |            | 4310.26±1096.2 |           |            | 67797.93±37215.77 |               |                 |
|                | 29.10±12.43 | 113.28±34.45 | 145.97±34.53 | 0.71±0.10 | 12.20±8.94 | 2              | 7.49±1.37 | 16.35±10.0 | 149394.60±144699. | 850.80±299.27 | 2439.47±1660.72 |
| Albiflorin     | 31.97±7.33  | 136.03±51.60 | 179.64±67.31 | 0.71±0.10 | 13.32±8.18 | 7593.60±3243.2 |           | 3          |                   |               |                 |
|                | 41.76±7.73  | 195.87±30.38 | 259.43±66.27 | 1.08±0.47 | 12.74±7.86 | 7              |           | 17.63±8.10 |                   |               |                 |
|                |             |              |              |           |            | 9666.39±2118.2 |           | 16.23±7.55 |                   |               |                 |
|                |             |              |              |           |            | 1              |           |            | 0                 |               |                 |

|                     |            |              |              |           |            |              |           |            |                  |               |                |
|---------------------|------------|--------------|--------------|-----------|------------|--------------|-----------|------------|------------------|---------------|----------------|
| Oxypaeoni<br>florin | 11.00±5.55 | 43.15±6.64   | 56.34±16.77  | 0.63±0.21 | 11.63±7.54 | 347.97±78.14 | 7.43±1.20 | 15.41±7.45 | 4942.84±1353.80  | 317.45±50.32  | 960.89±804.49  |
|                     | 13.77±4.74 | 58.53±13.77  | 71.14±17.02  | 0.54±0.10 | 9.23±2.09  | 543.42±114.7 | 7.55±0.90 | 12.86±2.29 | 6979.24±1997.60  | 444.62±135.55 | 919.38±307.57  |
|                     | 21.56±4.62 | 87.76±11.69  | 116.14±5.19  | 0.50±0.16 | 13.51±5.15 | 639.43±29.38 | 7.88±0.35 | 17.12±5.17 | 10992.03±3569.08 | 690.02±87.45  | 1980.07±571.31 |
| Poricoic<br>acid A  |            |              |              |           |            |              |           | 1521.44±66 |                  |               |                |
|                     | 7.81±4.17  | 58.34±32.40  | 69.77±35.24  | 2.67±1.51 | 8.56±2.26  | 128.09±61.58 | 7.75±0.56 | 5.04       | 443.98±219.49    | 443.98±219.49 | 794.53±355.07  |
|                     | 15.42±4.34 | 72.48±16.40  | 82.77±20.26  | 1.04±0.51 | 7.61±2.67  | 180.08±44.30 | 6.61±0.81 | 1783.08±52 | 481.57±135.07    | 481.57±135.07 | 860.09±370.64  |
|                     | 22.57±4.45 | 99.97±21.03  | 112.84±26.44 | 1.17±0.65 | 7.95±2.00  | 268.18±87.45 | 6.79±0.52 | 1.01       | 682.54±172.01    | 682.54±172.01 | 1154.08±438.70 |
|                     |            |              |              |           |            |              |           | 2589.92±54 |                  |               |                |
| Poricoic<br>acid B  |            |              |              |           |            |              |           | 8.64       |                  |               |                |
|                     | 13.92±3.90 | 75.66±26.78  | 87.37±18.47  | 2.00±1.10 | 12.23±13.2 | 40.53±9.10   | 7.03±0.42 | 15.07±13.6 | 679.29±748.52    | 529.52±188.12 | 1182.43±817.51 |
|                     | 28.41±8.52 | 119.95±33.34 | 133.19±32.48 | 1.67±1.21 | 5          | 53.51±12.19  | 5.74±0.86 | 2          | 506.22±195.93    | 679.25±172.30 | 1195.18±213.22 |
|                     | 35.95±8.74 | 141.91±41.47 | 159.33±46.64 | 1.17±0.41 | 9.63±3.01  | 91.65±27.11  | 5.67±0.98 | 9.23±1.94  | 869.19±245.83    | 810.63±320.58 | 1551.8±565.53  |
| Licochalco<br>ne A  |            |              |              |           | 10.75±6.42 |              |           | 9.63±1.90  |                  |               |                |
|                     | 1.08±0.20  | 11.43±1.69   | 17.55±2.70   | 2.17±0.98 | 13.43±1.54 | 92.37±15.28  | 9.44±0.40 | 21.28±2.11 | 1954.78±297.39   | 108.18±18.41  | 375.00±71.45   |
|                     | 1.47±0.11  | 16.35±1.88   | 28.44±7.01   | 1.83±0.41 | 19.54±6.07 | 116.55±24.65 | 9.63±0.13 | 27.60±7.20 | 3084.37±231.29   | 157.42±18.66  | 825.38±455.76  |
|                     | 2.94±0.97  | 25.91±9.50   | 37.37±17.13  | 3.33±1.03 | 14.11±3.03 | 194.20±66.59 | 9.03±0.59 | 19.42±3.88 | 3631.94±1163.37  | 237.25±103.25 | 767.46±504.79  |

Table S2. Main pharmacokinetic parameters of ADHD model group after administration of JYP.

| Compound<br>s     | C <sub>max</sub><br>(ng/mL) | AUC <sub>(0-t)</sub><br>(ng/mL·h) | AUC <sub>(0-∞)</sub><br>(ng/mL·h) | T <sub>max</sub><br>(h) | t <sub>1/2</sub><br>(h) | Clearances<br>(mL / h) | MRT <sub>(0-t)</sub><br>(h) | MRT <sub>(0-∞)</sub><br>(h) | V <sub>ss</sub><br>(mL) | AUMC <sub>(0-t)</sub><br>ng/mL*(h) <sup>2</sup> | AUMC <sub>(0-∞)</sub><br>ng/mL*(h) <sup>2</sup> |
|-------------------|-----------------------------|-----------------------------------|-----------------------------------|-------------------------|-------------------------|------------------------|-----------------------------|-----------------------------|-------------------------|-------------------------------------------------|-------------------------------------------------|
| Saikosap<br>nin A |                             |                                   | 232.86±91.18                      |                         |                         | 1291.22±525.61         |                             |                             |                         | 1392.40±460.59                                  | 4853.64±3957.39                                 |
|                   | 40.88±22.88                 | 163.91±57.46                      | 324.31±131.0                      | 0.50±0.16               | 13.28±7.06              | 2143.07±1609.0         | 8.75±1.60*                  | 19.45±9.93                  | 23782.60±13625.69       | *                                               | 5558.75±2961.42                                 |
|                   | 52.96±19.17                 | 240.37±96.61                      | 7*                                | 0.79±0.19*              | 12.24±2.82              | 0                      | 8.13±1.23*                  | 16.82±3.55                  | 35282.72±25449.21       | 1937.54±771.89                                  | *                                               |
|                   | 73.09±22.62                 | 307.06±55.58                      |                                   | *                       | 10.30±4.24              | 2855.71±621.15         | 7.95±1.20*                  | 14.51±5.42                  | 40360.07±12917.92       | *                                               | 5783.46±3073.92                                 |
|                   |                             | *                                 | 387.10±78.69                      | 0.58±0.13               |                         |                        |                             |                             |                         | 2395.92±288.80                                  | *                                               |
| Saikosap<br>nin D |                             |                                   |                                   |                         |                         |                        |                             |                             |                         |                                                 |                                                 |
|                   |                             | 91.33±24.62                       | 132.27±32.26                      |                         |                         |                        |                             | 20.27±5.60                  |                         | 761.68±201.22                                   |                                                 |
|                   | 22.57±2.41                  | 145.21±32.82                      | 187.52±55.24                      | 0.58±0.13               | 14.99±5.90              | 1343.52±399.07         | 8.43±0.96                   | *                           | 26784.08±8767.24        | 1149.72±377.93                                  | 2701.81±992.13*                                 |
|                   | 33.11±3.36                  | *                                 |                                   | 0.54±0.25               | 10.61±4.96              | 1952.91±715.40         | 7.80±1.36                   |                             | 26532.70±7619.14        | *                                               | 3004.18±2085.30                                 |
|                   | 41.49±12.39                 | 156.01±38.62                      | 200.87±50.03                      | 0.38±0.14               | 10.31±2.55              | 3506.08±856.33         | 8.26±0.54*                  | 14.80±6.52                  | 53202.65±17657.23       | 1294.18±361.60                                  | 3035.93±850.28                                  |
| Z-<br>Ligustilide |                             | *                                 |                                   |                         |                         |                        |                             | 15.15±2.75                  |                         | *                                               |                                                 |
|                   |                             |                                   |                                   |                         |                         | 8062.61±2184.2         |                             |                             | 145289.80±58639.0       |                                                 |                                                 |
|                   | 4.07±1.85                   | 36.70±18.17                       | 49.28±14.69                       | 1.67±1.21               | 12.78±3.20              | 2                      | 8.90±1.12                   | 17.86±4.80                  | 1                       | 322.64±100.23                                   | 870.35±311.46                                   |
|                   | 5.57±2.26                   | 44.73±18.17                       | 62.20±24.53                       | 1.13±.44                | 14.63±7.18              | 10040.73±4395.         | 8.72±0.80                   | 19.97±7.80                  | 207173.33±141485.       | 383.83±150.84                                   | 1224.58±657.13                                  |
|                   | 6.63±1.78                   | 49.53±16.75                       | 69.65±27.09                       | 0.96±0.10               | 12.48±3.72              | 33                     | 8.90±1.50                   | 17.99±5.00                  | 31                      | 458.69±201.28                                   | 1348.99±756.73                                  |
|                   |                             |                                   |                                   |                         |                         | 19177.75±1169          |                             |                             | 306975.33±95317.0       |                                                 |                                                 |
|                   |                             |                                   |                                   |                         |                         | 1.01                   |                             |                             | 8                       |                                                 |                                                 |

|                    |             |              |              |            |            |                |           |            |                   |                |                 |
|--------------------|-------------|--------------|--------------|------------|------------|----------------|-----------|------------|-------------------|----------------|-----------------|
| Levistilide<br>A   | 2.61±0.78   | 23.05±7.24   | 43.19±21.11  | 1.04±0.51  | 21.83±11.8 |                |           | 30.29±15.7 |                   |                |                 |
|                    | 3.46±1.33   | 22.07±7.91   | 42.96±11.90  | 1.13±0.44  | 7          | 583.82±391.47  | 9.48±1.38 | 8          | 13560.55±3696.98  | 221.98±85.74   | 1547.01±1200.74 |
|                    | 5.48±1.21   | 34.83±3.46   | 42.60±3.94   | 0.88±0.14* | 30.15±23.3 | 940.83±272.59  | 9.25±0.28 | 41.03±31.6 | 35525.00±20523.09 | 202.94±68.72   | 1908.62±1879.83 |
|                    |             |              |              | *          | 4          | 1786.84±173.43 | 8.15±0.93 | 4          | 24223.78±5474.48  | 282.51±29.20   | 585.23±168.30   |
| Ferulic<br>acid    |             | 174.27±35.55 |              |            | 9.51±2.70  |                |           | 13.65±3.32 |                   |                |                 |
|                    | 28.60±10.23 | **           | 240.77±94.77 | 1.94±2.47  | 10.77±5.14 | 41.09±16.96    | 8.41±2.19 | 16.16±8.17 | 554.79±128.74*    | *              | 4511.05±3598.15 |
|                    | 37.61±7.18  | 138.57±45.63 | 176.71±49.42 | 0.26±0.13  | **         | 106.16±38.60   | 8.47±1.41 | 14.43±5.48 | 1504.68±634.79    | 1141.49±272.08 | 2579.37±1378.12 |
|                    | 40.17±7.44  | 207.00±49.04 | 270.69±96.33 | 0.57±0.71  | 8.30±1.95  | 142.94±57.33   | 8.41±1.18 | 14.73±5.85 | 1957.50±726.62*   | 1721.27±433.91 | 4310.54±3003.20 |
|                    |             | *            |              |            | 8.91±3.85* |                |           |            |                   | *              |                 |
| Liquiritige<br>nin | 1.80±0.72*  | 17.22±5.10   | 29.56±8.94   | 0.71±0.19  | 17.74±5.19 | 178.52±55.32   | 9.97±1.24 | 25.79±7.03 | 3869.35±2209.32   | 169.83±48.23   | 776.47±351.07   |
|                    | 2.77±0.62** | 19.69±2.73*  | 29.15±6.87   | 0.50±0.16  | 14.38±6.03 | 349.45±70.98** | 9.08±0.96 | 20.75±7.90 | 6883.75±1548.30   | 178.55±30.04   | 642.59±413.59   |
|                    | 3.78±0.55   | 21.95±4.95** | 36.98±11.35  | 0.58±0.13  | 18.87±10.8 | 562.94±135.21* | 9.34±0.93 | 27.05±15.2 | 13934.89±4664.02* | 201.96±28.84** | 1121.62±1058.33 |
|                    |             |              |              |            | 1          |                |           | 4          |                   |                |                 |
| Liquiritin         | 2.51±1.07*  | 14.40±3.71** | 29.45±16.14  | 0.53±0.27  | 22.75±18.2 | 1949.37±695.17 |           | 31.67±22.7 | 34996.20±28160.02 |                |                 |
|                    | 3.66±0.64** | 15.36±2.24** | 22.76±3.51** | 0.54±0.25  | 7          | 4398.06±748.59 | 9.96±1.77 | 7          | 76300.87±39923.09 | 139.02±20.98** | 417.87±153.13   |
|                    | 7.17±3.53   | 20.39±4.01** | 27.75±6.02** | 0.51±0.73  | 13.49±4.39 | **             | 8.80±0.95 | 20.79±5.25 | *                 | 134.13±15.77** | 478.30±156.32   |
|                    |             |              |              |            | 11.71±3.79 | 7361.22±1682.0 | 8.19±0.87 | 16.93±4.17 | 121685.50±27070.5 | 166.05±32.15** | 479.91±186.34** |
|                    |             |              |              |            |            | 0**            |           |            | 4*                |                |                 |

|                 |              |              |              |            |            |                  |            |            |                   |                |                 |  |
|-----------------|--------------|--------------|--------------|------------|------------|------------------|------------|------------|-------------------|----------------|-----------------|--|
| Paeoniflorin    |              |              | 226.29±191.5 |            |            | 3673.59±1648.8   |            |            |                   |                |                 |  |
|                 | 39.57±5.34   | 144.54±57.20 | 4            | 0.63±0.31  | 14.25±10.9 | 8                | 7.61±1.59  | 18.77±14.9 | 53940.15±25027.14 | 1173.15±749.63 | 6541.21±11431.0 |  |
|                 | 44.88±9.70*  | 173.70±75.99 | 234.62±126.4 | 0.46±0.33  | 1          | 7279.35±5603.8   | 6.95±1.67  | 9          | 84884.42±41057.56 | 1245.17±723.09 | 6               |  |
|                 | 63.49±22.74* | 204.42±59.92 | 3            | 0.29±0.10* | 9.82±5.35  | 0                | 6.51±0.51* | 13.71±8.05 | 109397.02±35687.3 | 1309.93±289.55 | 3775.73±3756.09 |  |
|                 |              |              | 231.05±63.54 | *          | 7.21±2.51  | 11012.36±2893.69 |            | 9.89±2.27  | 3                 |                | 2274.30±887.26  |  |
| Albiflorin      |              |              | 226.29±191.5 |            |            | 3673.59±1648.8   |            |            |                   |                |                 |  |
|                 | 39.57±5.34   | 144.54±57.20 | 4            | 0.63±0.31  | 14.25±10.9 | 8                | 7.61±1.59  | 18.77±14.9 | 53940.15±25027.14 | 1173.15±749.63 | 6541.21±11431.0 |  |
|                 | 44.88±9.70*  | 173.70±75.99 | 234.62±126.4 | 0.46±0.33  | 1          | 7279.35±5603.8   | 6.95±1.67  | 9          | 84884.42±41057.56 | 1245.17±723.09 | 6               |  |
|                 | 63.49±22.74* | 204.42±59.92 | 3            | 0.29±0.10* | 9.82±5.35  | 0                | 6.51±0.51* | 13.71±8.05 | 109397.02±35687.3 | 1309.93±289.55 | 3775.73±3756.09 |  |
|                 |              |              | 231.05±63.54 | *          | 7.21±2.51  | 11012.36±2893.69 |            | 9.89±2.27  | 3                 |                | 2274.30±887.26  |  |
| Oxypaeoniflorin |              |              |              |            | 9.66±8.61  |                  |            | 12.55±5.31 |                   |                |                 |  |
|                 | 8.53±4.38    | 47.39±13.88  | 53.84±11.65  | 2.71±2.60  | 12.77±12.3 | 360.46±91.80     | 7.57±1.97  | 15.81±14.3 | 4725.76±2732.40   | 363.05±150.34  | 647.25±230.17   |  |
|                 | 12.69±7.45   | 81.72±35.35  | 96.39±28.89  | 1.83±1.17* |            | 414.32±120.17    | 7.14±1.32  | 2          | 7178.93±7592.04   | 559.87±206.42  | 1363.45±990.24  |  |
|                 | 25.73±9.19   | 112.83±43.59 | 127.95±45.72 | 1.08±0.49* | 1          | 671.36±310.16    | 7.10±1.14  | 10.91±3.15 | 7494.03±4533.51   | 786.02±296.19  | 1367.87±579.03  |  |
|                 |              |              |              |            | 8.11±3.60  |                  |            | *          |                   |                |                 |  |
| Poricoic acid A | 15.53±4.05** | 89.10±35.55  | 99.84±41.52  | 0.71±0.37* | 6.99±1.97  | 84.44±42.36      | 7.86±1.25  | 10.75±2.43 | 925.63±607.13     | 705.71±328.26  | 1082.34±582.13  |  |
|                 | 26.24±6.09** | 100.92±47.28 | 152.53±89.34 | 1.71±2.11  | 10.32±8.55 | 117.58±56.05     | 7.52±1.73  | 14.33±11.3 | 2518.64±3044.51   | 788.38±501.00  | 2959.99±4043.39 |  |
|                 | 30.54±16.03  | 194.98±85.11 | 225.13±98.33 | 4.42±2.50* | 6.86±3.37  | 178.73±160.12    | 8.05±1.46  | 0          | 1826.27±1334.95   | 1567.88±729.78 | 2703.46±1701.67 |  |
|                 |              | *            | *            |            |            |                  |            | 11.38±4.62 |                   |                |                 |  |
| Poricoic acid B | 17.37±8.26   | 110.35±56.12 | 136.15±93.67 | 0.75±0.39* | 8.04±4.49  | 34.42±18.58      | 8.56±1.68  | 12.63±6.43 | 394.18±220.52     | 948.35±595.70  | 2103.24±2792.61 |  |
|                 | 28.04±7.19   | 141.06±44.89 | 153.72±47.26 | 2.67±2.58  | 5.98±2.46* | 48.05±15.22      | 7.20±2.12  | 9.38±3.50  | 427.28±134.62     | 1064.19±564.04 | 1509.97±839.70  |  |
|                 | 38.23±13.61  | 241.88±68.85 | 250.00±69.23 | 5±1.10**   | 4.23±1.12* | 58.10±16.47*     | 7.04±0.43* | 7.84±0.93  | 459.11±151.78**   | 1696.05±470.24 | 1946.42±524.46  |  |
|                 |              | *            | *            |            |            |                  |            |            |                   | *              |                 |  |

|                |             |             |              |            |            |   |               |             |            |   |                 |               |                 |
|----------------|-------------|-------------|--------------|------------|------------|---|---------------|-------------|------------|---|-----------------|---------------|-----------------|
| Licochalcone A | 1.45±0.20*  | 14.85±3.04* | 28.80±6.93** | 1.08±0.47* | 23.98±10.6 | 2 | 58.07±15.14** | 10.25±0.51* | 34.36±13.8 | 0 | 1891.10±569.09  | 151.85±28.97* | 1038.56±608.98* |
|                | 2.50±0.53** | 18.32±4.23  | 25.84±6.29   | 2.17±0.98  | 2*         |   | 129.92±35.81  | 8.41±0.75** | 0*         |   | 2365.98±778.28  | 155.16±44.11  | 512.63±272.88   |
|                | 3.45±0.70   | 23.09±5.76  | 30.73±5.56   | 2.67±1.03  | 13.48±7.30 |   | 211.57±33.51  | 8.41±0.95   | 19.09±7.67 |   | 3697.79±1176.34 | 195.07±60.32  | 527.62±128.84   |
|                |             |             |              |            | 12.90±4.17 |   |               |             | 17.35±4.38 |   |                 |               |                 |
